# Supplementary material for: BHLHE40 Regulates IL-10 and IFN-γ Production in T Cells but Does Not Interfere With Human Type 1 Regulatory T Cell Differentiation
Source: Front Immunol. 2021 Jul 7;12:683680. doi: 10.3389/fimmu.2021.683680 (PMC8293608; doi:10.3389/fimmu.2021.683680)
Supplement: Supplementary file 1 [file DataSheet_1.csv]

	baseMean	log2FoldChange	lfcSE	stat	pvalue	padj
TCF7	2378.08918473571	-0.826118928332118	0.102877435825669	-8.03012751729174	9.73714061127232e-16	2.93428732320691e-13
BHLHE40	219.893364818531	1.24664745069935	0.155657826855257	8.00889666703739	1.15742105167685e-15	3.40281789192995e-13
FOS	1393.34273907015	0.964813003424054	0.124491393460963	7.75003778656064	9.18652081385245e-15	2.3069650393787e-12
RORA	2836.54838970028	0.587211888460611	0.0875857941946665	6.70441929378964	2.02208873684356e-11	3.24990101785497e-09
HIVEP2	3195.05712899906	-0.64547419381389	0.100437602802974	-6.42661887381064	1.30473398359726e-10	1.82875156259086e-08
LEF1	1100.13260677152	-0.778471441070863	0.122485081893305	-6.35564289983477	2.07556694686868e-10	2.71944391060381e-08
NR4A2	1049.66477096639	0.729351198813655	0.119438674246323	6.10649107934239	1.01845325811326e-09	1.13670699752752e-07
FOXP1	2676.90655426387	-0.508250079849095	0.0859125199619011	-5.91590236294412	3.30060972570144e-09	3.23459753118742e-07
E2F7	9.0614995873999	6.24168917301906	1.06494700207755	5.86103267190052	4.59997450318909e-09	4.2585160305516e-07
E2F8	13.4355108722918	5.44073914658203	0.984696768833672	5.52529399789372	3.2893432598982e-08	2.3973991916361e-06
AFF2	37.1051342483275	-2.08274693555372	0.383240656696412	-5.434566764151	5.49297276908609e-08	3.7835596433465e-06
KLF8	60.4563474987079	1.38541712562126	0.258444731965981	5.36059340456443	8.29490245493006e-08	5.43406272781124e-06
MXI1	485.693324406874	-0.636131084037504	0.118971508171325	-5.34691955927334	8.94637519907389e-08	5.7978283144966e-06
HIVEP1	1206.4998280954	-0.588096495817208	0.11074177834775	-5.31052060560628	1.09312523777173e-07	6.82721845393803e-06
MAF	501.358989320108	0.718610704504816	0.136167531644585	5.27740127052081	1.31028757286902e-07	7.93678713736841e-06
GATA3	380.079083315963	0.849314544048614	0.162006683721297	5.24246607942239	1.58444526596669e-07	9.27114790793224e-06
MYBL1	553.851729758041	0.512306492155189	0.0993177910311579	5.15825499979625	2.49261994831807e-07	1.43076385033457e-05
REL	881.135871493964	0.558377871363776	0.108865086009878	5.12908124936504	2.91159666260735e-07	1.62483269310504e-05
ZNF101	318.62931878229	-1.1330268206793	0.223426199017813	-5.07114575488513	3.95427765687298e-07	2.09449857025253e-05
IKZF2	243.183960051816	-0.908501431513619	0.180866168875086	-5.02305896765618	5.08549221802595e-07	2.59747979644427e-05
GTF3A	463.920724490774	-0.588294542290985	0.119713984184019	-4.91416726542728	8.91606067650994e-07	4.29896781578603e-05
ARNTL2	16.2313659558211	3.2135870596979	0.660628452160967	4.86443938220646	1.14781677266917e-06	5.39007612200677e-05
CSDE1	2601.49639842693	-0.398213696824182	0.0828875681806444	-4.8042632395285	1.55322371341254e-06	6.98602934383384e-05
STAT4	647.580621366975	0.519719117237072	0.108540305542993	4.78825920598877	1.68234264739104e-06	7.45549936457778e-05
TP63	15.3881199593749	2.58105006854419	0.550580410121701	4.68787123750674	2.76061615133063e-06	0.00011357156002778
FOSB	230.836208781981	0.761704457293261	0.164377106676613	4.63388407725049	3.58868001671135e-06	0.000142765507991547
HMGB1	645.223047173325	0.439139166519483	0.10047527982766	4.37061899476881	1.23894813663086e-05	0.000421872340083287
STAT6	252.601629441356	-0.718414254296593	0.164761921485118	-4.36031728582069	1.29873988801661e-05	0.000437290799166264
HMGB2	978.09496329696	0.657700281119487	0.153201094586868	4.29305210183441	1.76233629878789e-05	0.000571263841536833
SMAD5	187.829240363733	0.819240628993205	0.191900584904263	4.26908875448147	1.96273164009312e-05	0.000629222531640491
PLAG1	96.858914350758	-1.14528581510397	0.276847427629836	-4.13688443815089	3.5205329717714e-05	0.00103503669370079
UBTF	138.035726921377	-0.792780572887078	0.193703773473401	-4.09274718128266	4.26292431093508e-05	0.00122345927723837
SMARCC1	1434.62382494686	-0.439830094407565	0.108122532840937	-4.06788560026259	4.74416611210012e-05	0.0013417570890948
FOSL2	277.260971557208	0.59917895214056	0.147834842824241	4.05302931767525	5.05586636212043e-05	0.00139140212623287
ZNF687	27.5304374427605	-1.61656759224012	0.403262228953629	-4.00872552937758	6.10473199315786e-05	0.00161728438341813
ZBTB7A	361.448877646766	0.565778486512913	0.144368091180654	3.91899956483409	8.89172751725342e-05	0.00219183810824075
VDR	6.3143307804664	3.52537686288079	0.914925967724364	3.85318264782584	0.00011659235050129	0.0027131355076111
ZNF559	51.2183253304251	-1.09006676655395	0.285617837919823	-3.81652201589716	0.000135346003754637	0.0030666555061248
AHR	1115.16162250837	0.530061684624039	0.13981594723438	3.79113895881614	0.000149958019652436	0.00333077217990895
ARNT	178.581752762908	0.651118649375374	0.172083038726458	3.78374681313239	0.000154484979255518	0.00340431798893238
NR3C2	254.499586081222	-0.486836007691525	0.129821934872566	-3.75002890050441	0.000176814191119804	0.00376557996423696
TERF2	111.326670216098	-0.799665590192441	0.216914632801774	-3.68654516232295	0.000227319115663691	0.00464230265906439
BACH2	673.62294876215	-0.482011972091108	0.131802733774994	-3.65707112656686	0.000255113608029577	0.00508615353627098
KLF3	1494.16045763269	-0.365942623572344	0.100483627637616	-3.64181341951627	0.000270724263330458	0.00532350778170528
NR4A3	105.683337726903	0.782167133634316	0.216456469276337	3.61350777017328	0.000302082298283544	0.00582608003761575
MLXIP	196.514546032942	-0.64235109015551	0.178189277559888	-3.60488071421481	0.000312296335664873	0.00597526988905457
PPARG	8.30346222009214	3.32153380182903	0.92834285600505	3.57791712441526	0.000346343224228972	0.00639329437190817
SATB1	1306.89755366793	-0.509324390314043	0.143350490621586	-3.55300067760876	0.000380863483884969	0.00690365178157807
SP110	834.366656309993	-0.377241856143249	0.107102276876024	-3.52225804293522	0.000427887432125146	0.00750764935492942
ARID4B	1537.65043745037	0.37888575947908	0.109027639347225	3.47513494511631	0.000510596425825413	0.00863259631460776
ZNF212	11.1133853061199	2.23415232231532	0.643299265580495	3.47295954130973	0.000514752946260606	0.0086538800756281
TRPS1	275.948634839845	-0.690396851334857	0.201571789745438	-3.42506683205397	0.000614648203019684	0.0100121208637828
YBX1	1199.76262726058	-0.889432099136877	0.260575959841327	-3.41333137438497	0.000641738587502876	0.0103416001788231
KLF6	1150.45802236699	0.394382039309943	0.117638124203156	3.35250193745747	0.000800846809065162	0.0122505170513597
NR3C1	1055.88721852125	0.538527158513669	0.163740296429719	3.28891036755156	0.0010057604757881	0.0145481428908215
ZNF844	32.3411565904541	-1.23579784829464	0.377283547070512	-3.2755148160852	0.00105469581978575	0.0150989351682868
PRDM1	1845.59091735274	0.399088392455354	0.121888751486892	3.27420198818159	0.00105960840028311	0.0151448177444591
ZNF681	40.0353395623067	-1.21054690171723	0.372309819044977	-3.25145037759799	0.00114817816533317	0.0160744943146644
NR4A1	14.4924620230999	1.68003713959265	0.519053988583933	3.23672908125815	0.00120908138339148	0.016617749663996
ZNF200	21.8265761163249	-1.50026923419191	0.464977234404912	-3.22654341585558	0.00125295221652356	0.017027154473478
ELK4	2167.33118752316	-0.345488921525225	0.107339260423957	-3.21866314487961	0.00128789683746315	0.0173844439851969
E2F1	4.75984240549279	3.52492498871493	1.09619620365955	3.21559678545437	0.001301735910709	0.0175319828689233
ARID5B	1607.29913745309	-0.354464085205889	0.110395317467662	-3.21086159573501	0.00132337656125425	0.017763898740934
ZBTB11	485.284183372086	0.349709990154565	0.110010495727267	3.17887841376108	0.00147846093717242	0.0193580050483259
GLI3	3.98010953301243	3.71653014392386	1.16917651248926	3.17875881376637	0.00147907106765456	0.0193580050483259
ZHX2	267.915264402116	-0.571001215132767	0.183346898743388	-3.11432164408704	0.00184368385119483	0.0228404574946583
ZNF776	51.496824088462	-0.888913441135497	0.293118813260434	-3.03260453072899	0.00242453109447977	0.028264311231005
SP1	717.391823266451	-0.346255453965577	0.114538806008574	-3.02304053998657	0.00250248716612227	0.0288384132891375
ZSCAN29	65.5192765172712	-0.793724544498931	0.263717016925279	-3.00975854252069	0.00261455450181938	0.0299295726162685
ZSCAN18	31.032342269648	-1.27694947362957	0.425535417646144	-3.00080656198498	0.00269265558547114	0.0306779493641485
TADA2B	95.9309510485077	-0.645606576922915	0.21581293334397	-2.99151013296281	0.00277601325156487	0.0311214062284615
TSC22D2	136.9939110131	0.598592839007611	0.200112203894752	2.99128602532626	0.00277805152661561	0.0311214062284615
NR2C1	186.234779276208	0.488907610210541	0.163668600702297	2.98718024173637	0.00281563666619297	0.0314547584562465
PIAS1	1032.69775866392	-0.33411396507673	0.111990530326226	-2.9834126519757	0.0028505338678512	0.0317269946842829
NFYC	131.007875438622	-0.60889556166151	0.204113142371258	-2.98312766433237	0.00285318955671056	0.0317272573031265
PRDM2	2244.64276286858	-0.296419944107412	0.0995282556183514	-2.97824916417762	0.00289900209708233	0.0320932698186
ZNF439	17.1475578628452	-1.51257408951912	0.512127295664606	-2.9535119536173	0.00314180440488555	0.0340152798371822
FOXP3	45.2993502550613	-1.08434134727201	0.371630033860257	-2.91779794008724	0.00352512699094413	0.037151732109669
TULP4	297.547781041696	-0.436349611573774	0.150500456911451	-2.89932416504561	0.0037396803488866	0.0388876505162658
E2F2	18.7727562981461	1.27343599874508	0.440597843902828	2.89024564320367	0.00384940903568984	0.0395911062424961
TSHZ1	171.84040276537	-0.477961690497166	0.166615910773137	-2.86864374644241	0.00412235830008967	0.0415823489115322
ZHX1	177.135187935444	-0.481205598231872	0.168446156656298	-2.85673242883027	0.00428026493250611	0.0426047179987024
ZNF561	81.9251068767046	-0.650843072408399	0.229205978897862	-2.83955538829301	0.00451764514636493	0.0443450281712401
NFAT5	1282.78706757339	0.293198096897535	0.10376975000507	2.82546789293806	0.00472116192508884	0.0458572810999362
ZNF319	285.305291104166	-4.04186134937547	1.43087070353467	-2.82475652020192	0.00473165563308669	0.0459222037046916
ZMIZ1	160.39650169181	0.477100464532344	0.16898675638842	2.82330091853895	0.004753193545869	0.0460941230908326
KLF9	272.187462594784	-0.428937866025962	0.152396378439789	-2.81461981194936	0.00488349699782704	0.0470173105525616
HLF	86.862513401333	0.93809394713574	0.333922760514836	2.80931418298472	0.00496471696808649	0.0474957923280274
ZNF426	73.4206062436593	-0.906359969611682	0.324065092705412	-2.79684541782968	0.00516042166841498	0.0488638827895319
ZBTB49	34.6559827314718	1.00139700584235	0.358604749726879	2.79248115538078	0.00523055141814642	0.0493341680706862
