# Supplementary material for: BHLHE40 Regulates IL-10 and IFN-γ Production in T Cells but Does Not Interfere With Human Type 1 Regulatory T Cell Differentiation
Source: Front Immunol. 2021 Jul 7;12:683680. doi: 10.3389/fimmu.2021.683680 (PMC8293608; doi:10.3389/fimmu.2021.683680)
Supplement: Supplementary file 3 [file Table_1.xlsx]

## Sheet: Sheet1
Supplementary Table 1 - Antibodies
	Antibody/Reagent	Clone	Fluorophore	Vendor	Catalog Number	ul Antibody
Ex vivo Tr1 cell surface staining panel	CD4	RPA-T4	APC-Cy7	Biolegend, San Diego, CA, USA	300517	1
	CD3	OKT3	PerCPCy5.5	Biolegend	317335	0.5
	CD45RA	HI100	Pacific Blue	Biolegend	304123	1
	LAG3		PE	R&D Systems,Minneapolis, MN, USA	FAB2319P	5
	CD49b	REA188	FITC	Miltenyi Biotec, Bergisch Gladbach, Germany	130-100-337	5
	LIVE/DEAD Fixable Aqua Dead Cell Stain	-	-	Invitrogen, Carlsbad, CA, USA	L34957	0.25
Alloantigen specific Tr1 cell surface staining	CD4	RPA-T4	APC-Cy7	Biolegend, San Diego, CA, USA	300517	1
	CD3	OKT3	BV605	Biolegend	317322	0.5
	CD45RA	HI100	Pacific Blue	Biolegend	304123	1
	LAG3	3DS223H	PE	eBioscience	12-2239-42	5
	CD49b	P1H5	APC	eBioscience	17-0500-42	5
	LIVE/DEAD Fixable Aqua Dead Cell Stain	-	-	Invitrogen, Carlsbad, CA, USA	L34957	0.25
Intracellular Cytokine Staining	CD4	RPA-T4	APC-Cy7	Biolegend	300517	0.5
	IFN-g	B27	PE-Cy7	BD Biosciences, USA	BDB557643	0.75
	IL-2	MQ1-17H12	APC	Biolegend	500310	0.75
	IL-4	MP4-25D2	BV421	Biolegend	500826	0.75
	IL-10	JES3-9D7	PE	Biolegend	501403	2
	IL-17	BL168	BV605	Biolegend	512325	0.75
	LIVE/DEAD Fixable Aqua Dead Cell Stain	-	-	Invitrogen	L34957	0.25
FcR block	FcR Blocking Reagent	-	-	Miltenyi Biotec	130-059-901	2
	Surface staining protocol: Resuspend cells in 50ul FACS Buffer (PBS + 0.1% BSA + 1mM EDTA). Add in FcR reagent and incubate for 10min at room temperature. Mix staining antibodies and add, then incubate for 15min at room temperature or for Tr1 cell surface staining, incubate at 37C for 15mins. Add 150ul FACS Buffer to wash, then pellet by centrifugation and resuspend in 150ul FACS Buffer.
	Intracellular cytokine staining protocol: Perform surface staining with CD4 antibody and LIVE/DEAD stain and resuspend in 50ul 1x Fix/Perm. Fix for 10 mins in the fridge. Wash fixed cells and resuspend in 150ul 1X BD Perm/Wash buffer (BD Fixation/Permeabilization Kit, BD Biosciences). Add cytokine detecting antibodies and stain for 30min at 4ºC in the dark. Add 150ul 1x BD Perm/Wash buffer to was…
